# Supplementary material for: A1H-NMR based metabolomics study of the intervention effect of mangiferin on hyperlipidemia hamsters induced by a high-fat diet
Source: Royal Society of Chemistry journal article supplement (doi:10.1039/c7fo00081b), 2017-01-01
Supplement: c7fo00081b1.pdf [file c7fo00081b1.pdf]

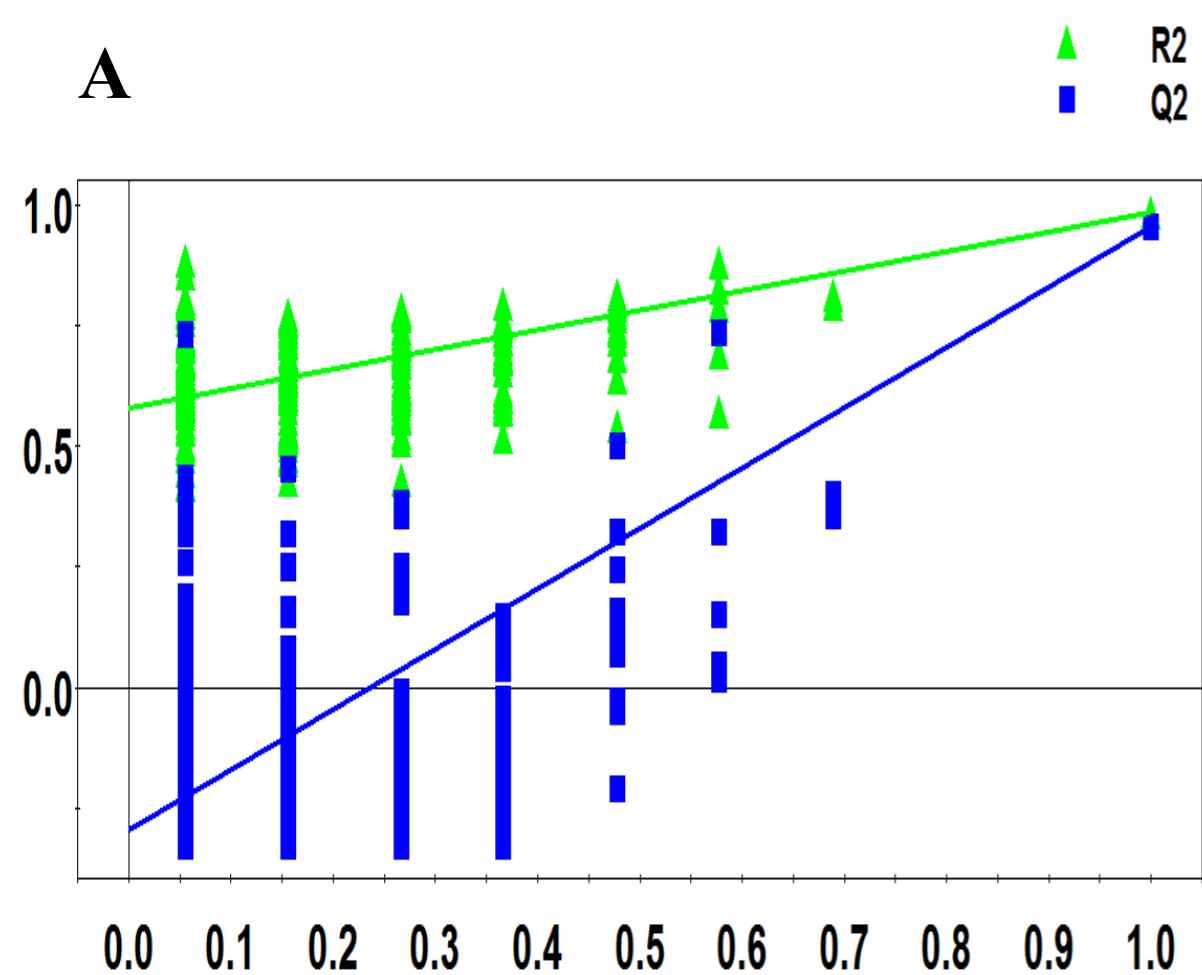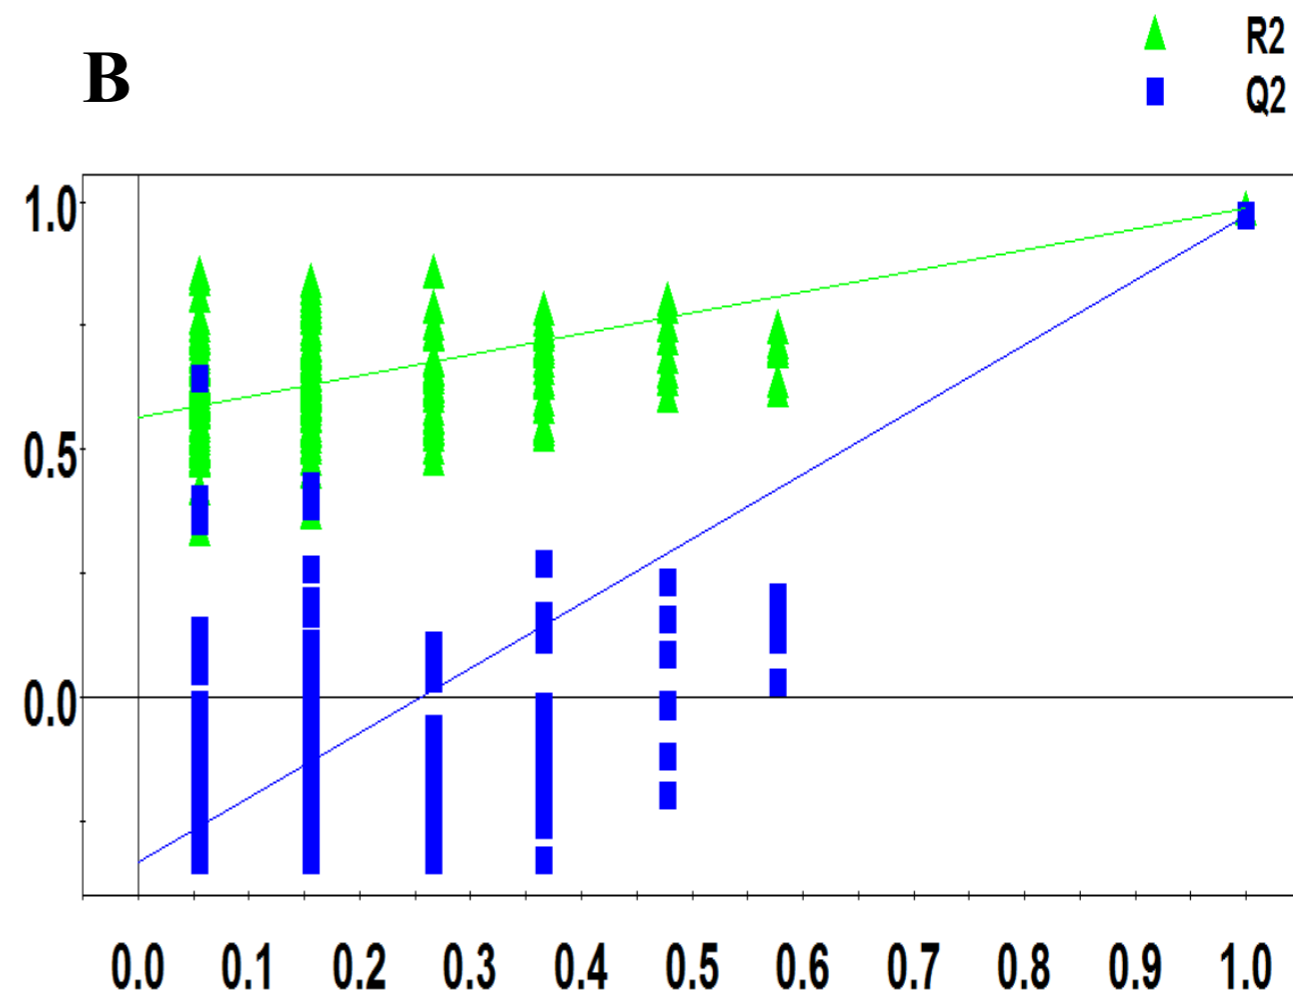

Fig. S1 The permutation test plots for the OPLS-DA models for classification of (A) normal diet (ND) and high fat diet (HFD) groups, and (B) HFD and mangiferin intervention (MI) groups (number of permutations, 200).
