# Supplementary material for: A1H-NMR based metabolomics study of the intervention effect of mangiferin on hyperlipidemia hamsters induced by a high-fat diet
Source: Royal Society of Chemistry journal article supplement (doi:10.1039/c7fo00081b), 2017-01-01
Supplement: c7fo00081b2.pdf [file c7fo00081b2.pdf]

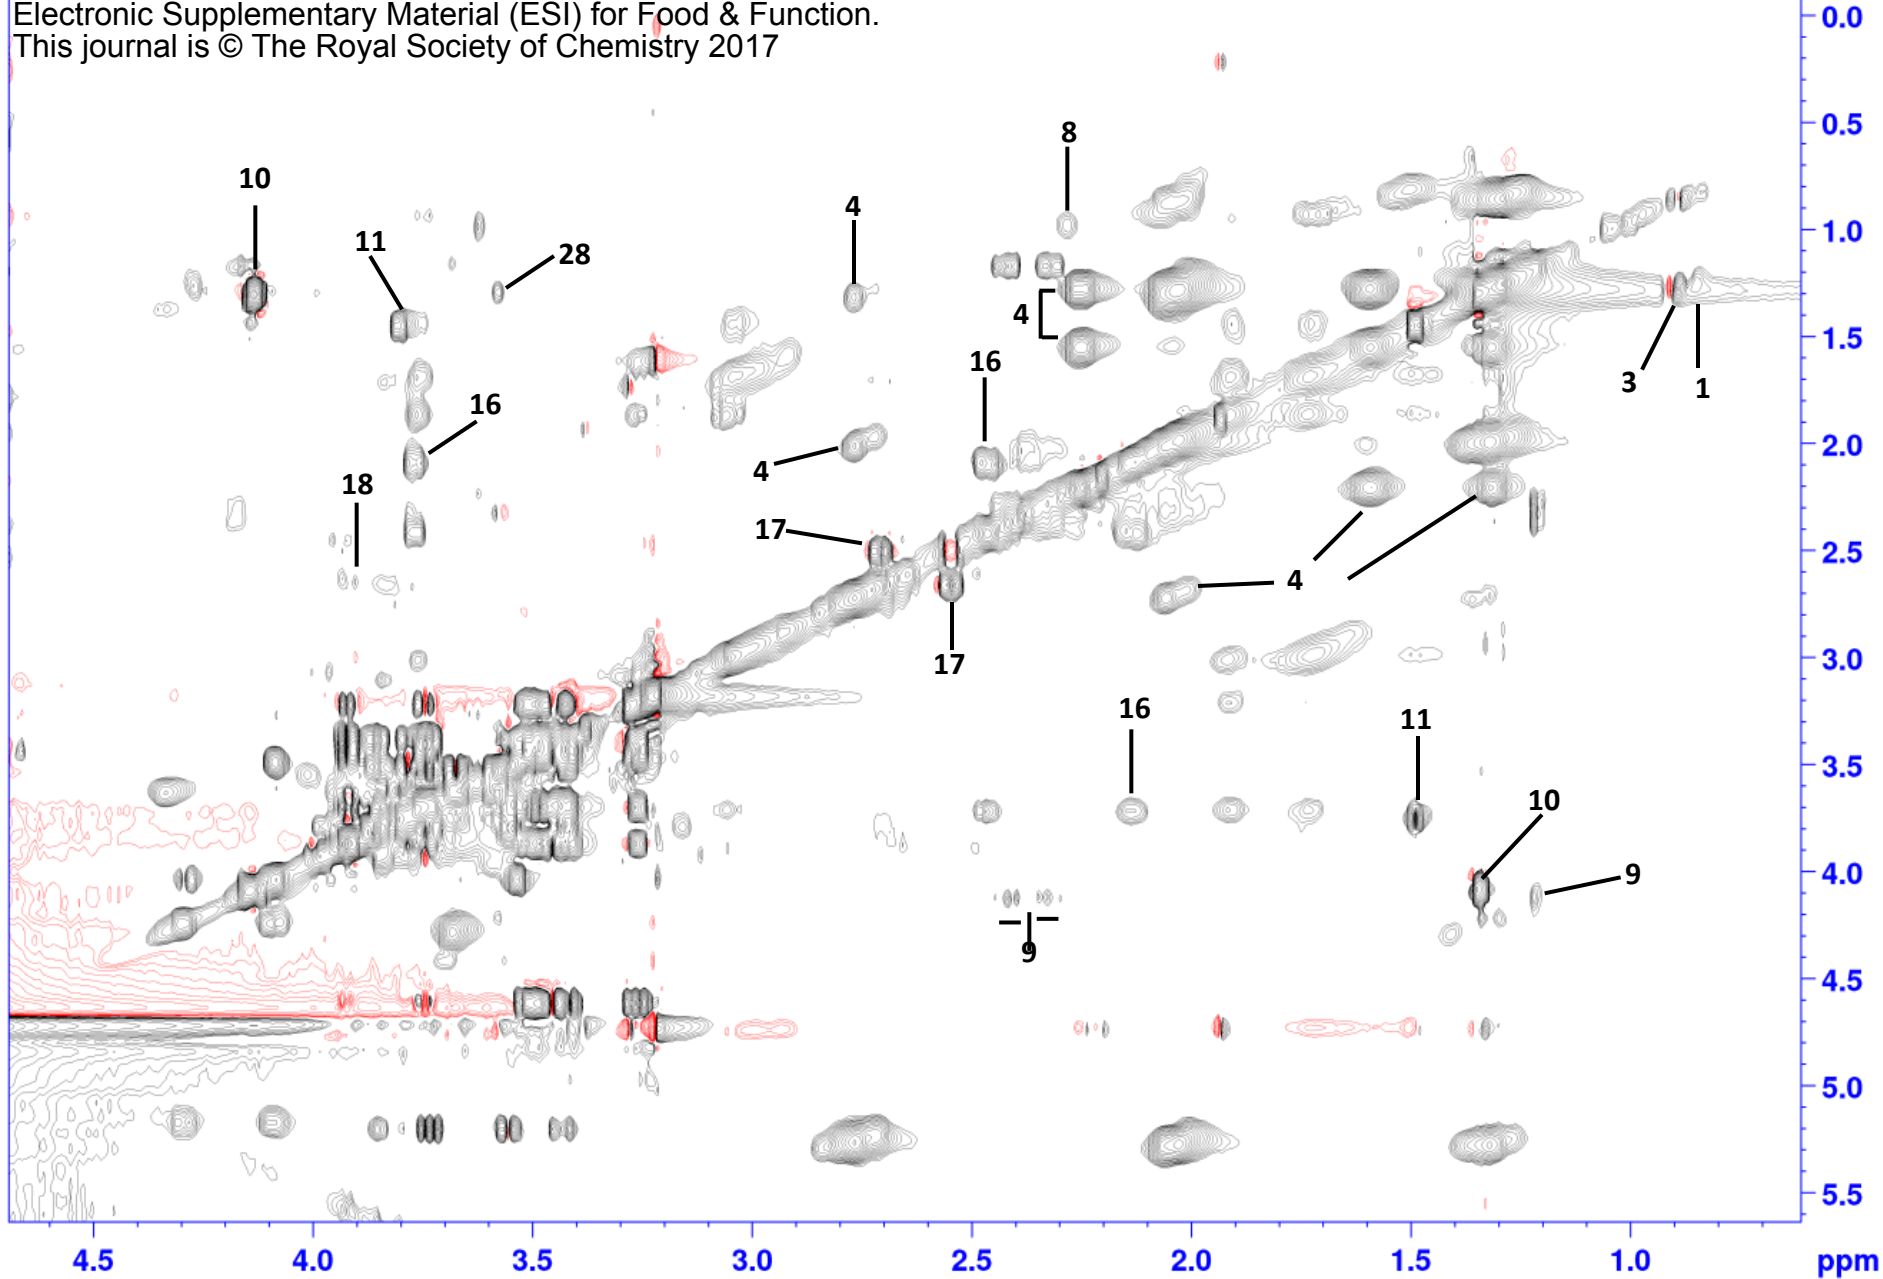

**Fig. S2 2D 1H,1H TOCSY serum spectrum from mangiferin intervention (MI) group.** Region between 0 and 4.5 ppm is represented. Each cross-peak is numbered, and its assignment is given in Table S1.
