# Supplementary material for: A1H-NMR based metabolomics study of the intervention effect of mangiferin on hyperlipidemia hamsters induced by a high-fat diet
Source: Royal Society of Chemistry journal article supplement (doi:10.1039/c7fo00081b), 2017-01-01
Supplement: c7fo00081b3.pdf [file c7fo00081b3.pdf]

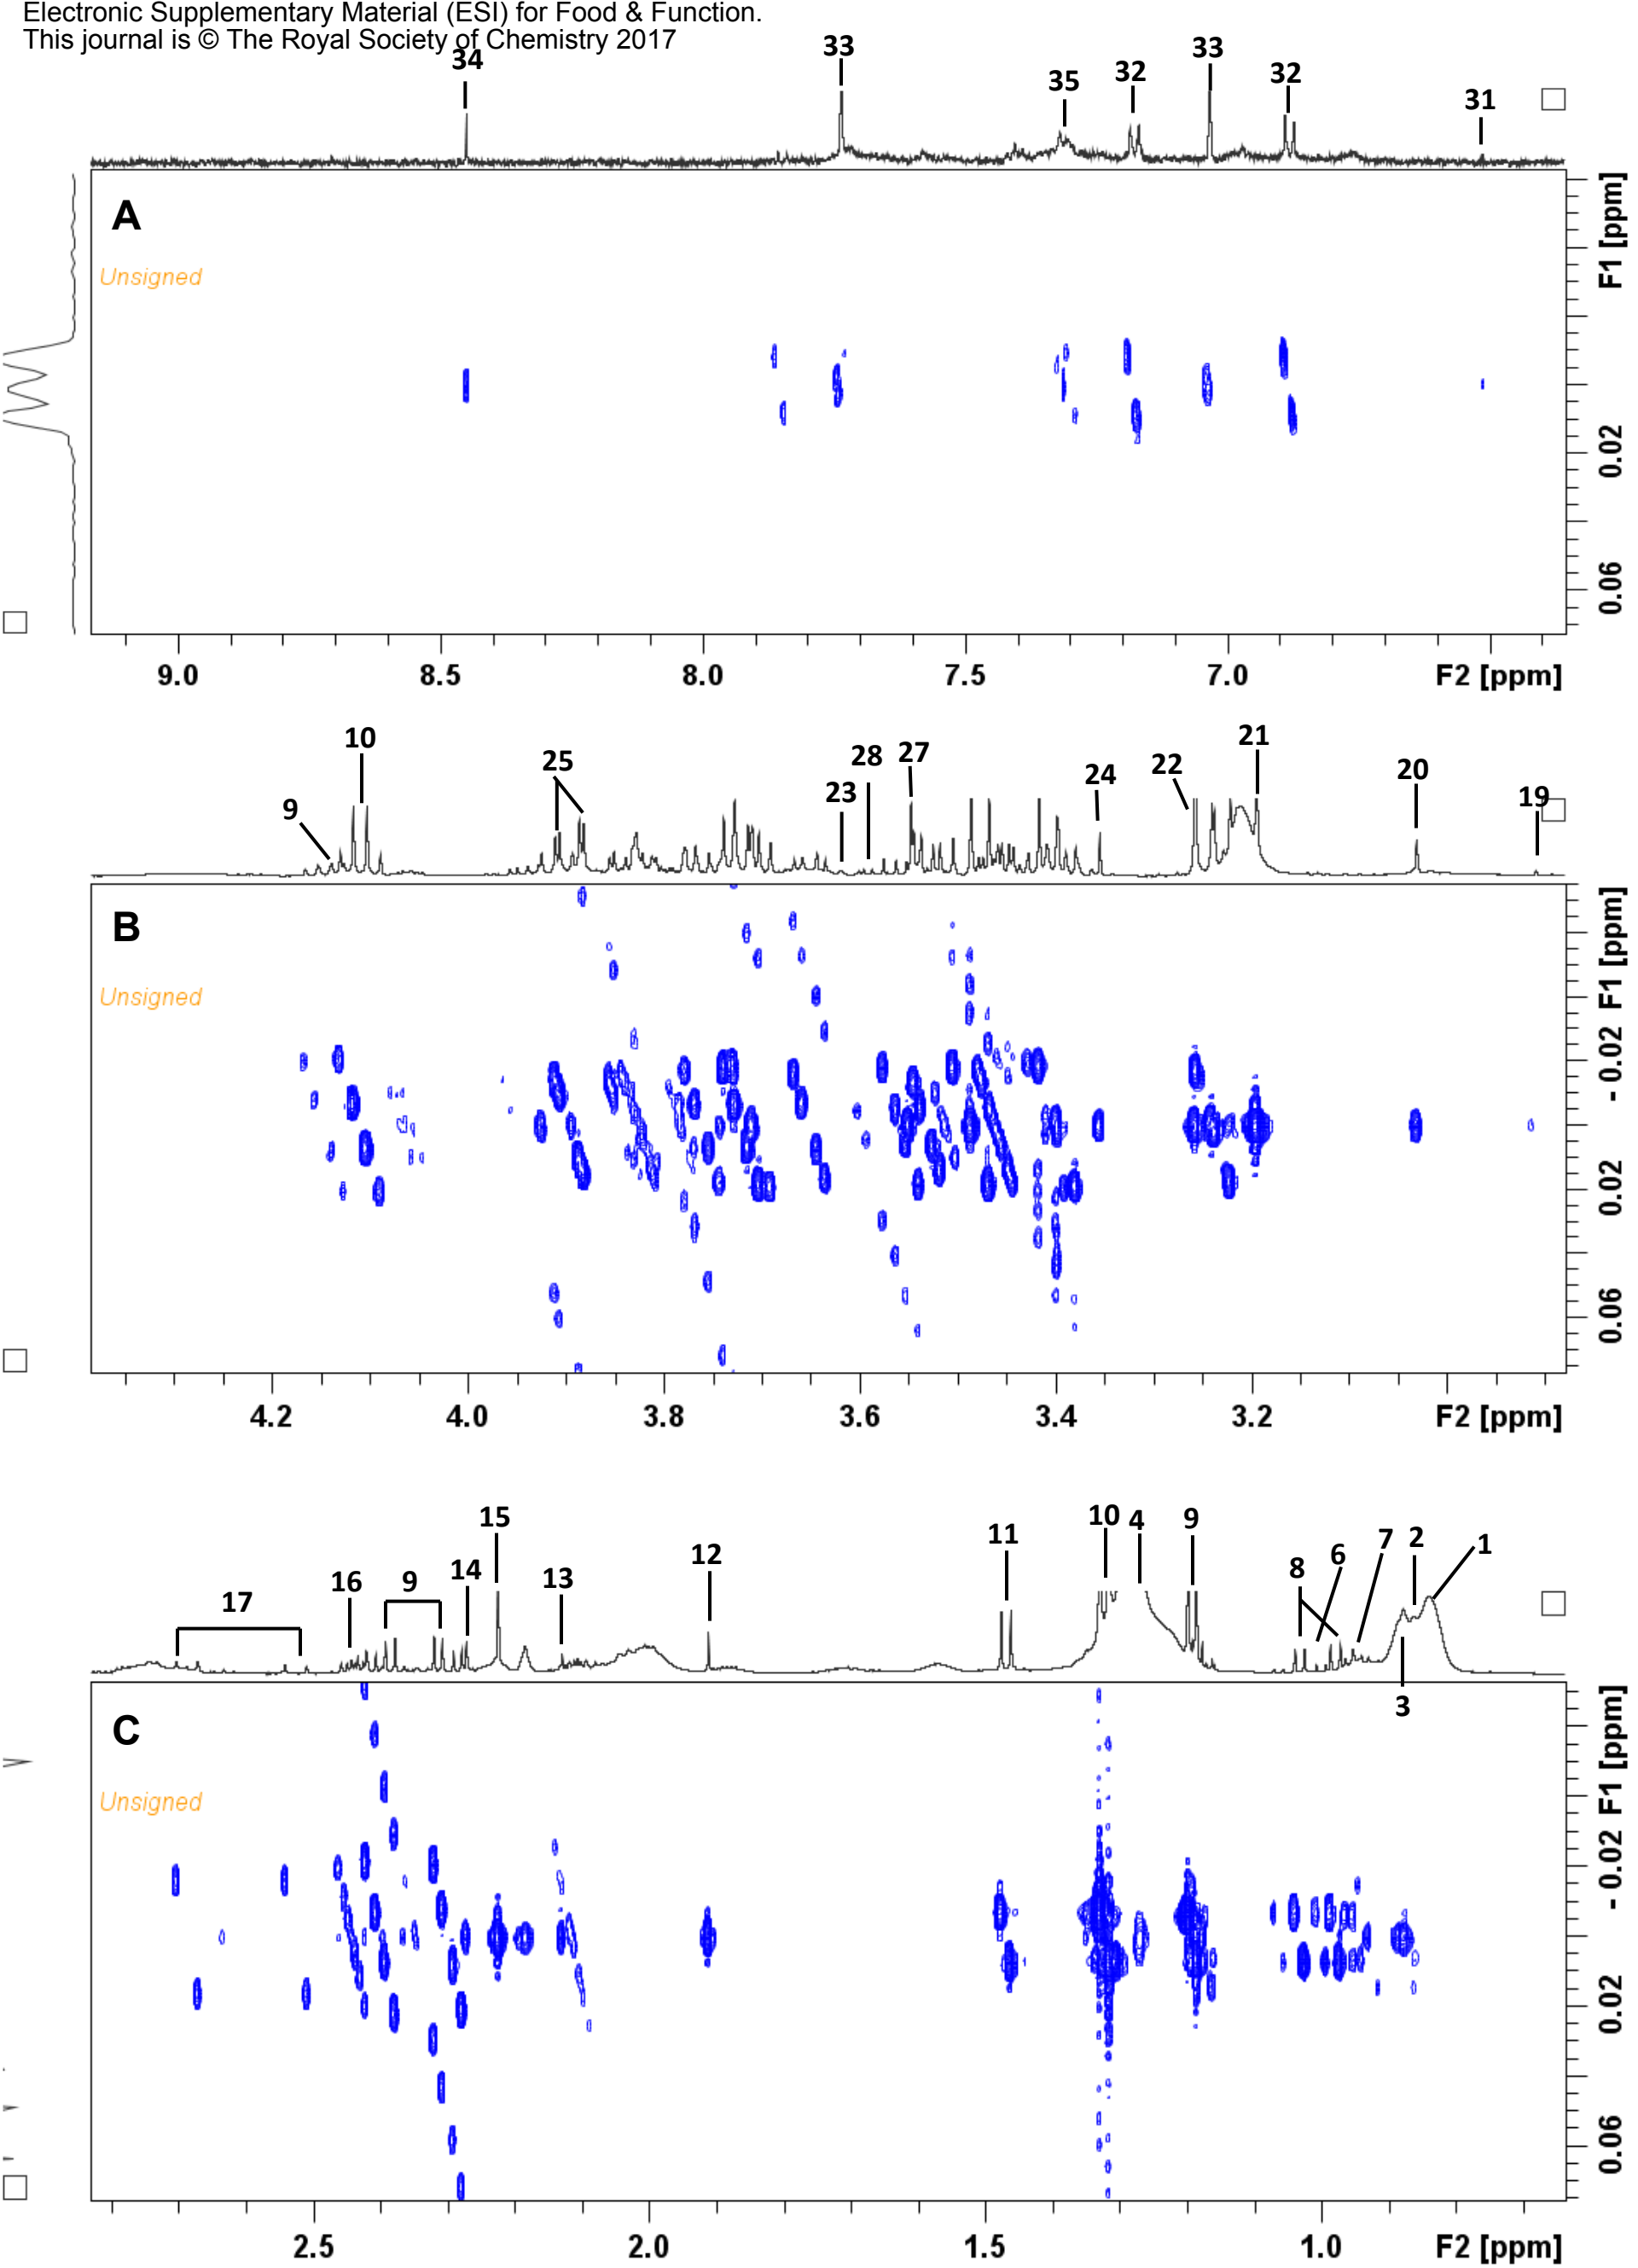

**Fig. S3 JRES NMR spectrum of serum from mangiferin intervention (MI) group.** (A) Spectral region covering the range 6.4 ppm-9.0 ppm, (B) spectral region covering the range 2.9 ppm-4.3 ppm, and (C) spectral region covering the range 0.7 ppm-2.8 ppm, and its assignment is given in Table S1.
