# Supplementary material for: A1H-NMR based metabolomics study of the intervention effect of mangiferin on hyperlipidemia hamsters induced by a high-fat diet
Source: Royal Society of Chemistry journal article supplement (doi:10.1039/c7fo00081b), 2017-01-01
Supplement: c7fo00081b4.pdf [file c7fo00081b4.pdf]

Table S1 <sup>1</sup>H Chemical shift assignment of the metabolites in serum from hamsters

| Keys | Metabolites                           | Moieties | $\delta^1\text{H}$ (ppm) and multiplicity <sup>a</sup> |
|------|---------------------------------------|----------|--------------------------------------------------------|
| 1    | Cholesterol                           | 0.84(m)  | CH <sub>3</sub> (C26 and C27)                          |
| 2    | Lipids (mainly HDL)                   | 0.86 (t) | -CH <sub>3</sub> (CH <sub>2</sub> ) <sub>n</sub>       |
| 3    | Lipids (mainly VLDL)                  | 0.88 (t) | CH <sub>3</sub> CH <sub>2</sub> CH <sub>2</sub> C=     |
| 4    | Lipids(triglycerides and fatty acids) | 1.27(m)  | CH <sub>3</sub> (CH <sub>2</sub> ) <sub>n</sub>        |
|      |                                       | 1.57(m)  | CH <sub>2</sub> CH <sub>2</sub> CO                     |
|      |                                       | 2.01(m)  | CH <sub>2</sub> -C=C                                   |
|      |                                       | 2.24(m)  | CH <sub>2</sub> -C=O                                   |
|      |                                       | 2.74(m)  | =C-CH <sub>2</sub> -C=                                 |
| 5    | Unsaturated lipids                    | 5.30 (m) | -CH=CH-                                                |
| 6    | Isoleucine                            | 1.00(d)  | $\gamma$ CH <sub>3</sub>                               |
|      |                                       | 0.93(t)  | $\delta$ CH <sub>3</sub>                               |
|      |                                       | 3.65(dd) | $\alpha$ CH                                            |
| 7    | Leucine                               | 0.95(d)  | $\alpha$ CH                                            |
|      |                                       | 0.96(d)  | $\beta$ CH <sub>2</sub>                                |
|      |                                       | 1.71(m)  | $\delta$ CH <sub>3</sub>                               |
|      |                                       | 3.72(dd) | $\delta'$ CH <sub>3</sub>                              |
| 8    | Valine                                | 0.98(d)  | $\gamma$ CH <sub>3</sub>                               |
|      |                                       | 1.03(d)  | $\gamma$ CH <sub>3</sub>                               |
|      |                                       | 2.26(m)  | $\beta$ CH                                             |
|      |                                       | 3.60(d)  | $\alpha$ CH                                            |
| 9    | 3-Hydroxybutyrate                     | 1.19(d)  | $\gamma$ CH <sub>3</sub>                               |
|      |                                       | 2.30(dd) | $\alpha$ CH                                            |
|      |                                       | 2.40(dd) | $\alpha$ CH                                            |
|      |                                       | 4.15(m)  | $\beta$ CH <sub>2</sub>                                |
| 10   | Lactate                               | 1.32(d)  | $\beta$ CH <sub>3</sub>                                |
|      |                                       | 4.11(q)  | $\alpha$ CH                                            |
| 11   | Alanine                               | 1.47(d)  | $\beta$ CH <sub>3</sub>                                |

|    |                   |          |                                   |
|----|-------------------|----------|-----------------------------------|
|    |                   | 3.76(q)  | $\alpha$ CH                       |
| 12 | Acetate           | 1.91(s)  | $\beta$ CH <sub>3</sub>           |
| 13 | Methionine        | 2.13 (s) | $\delta$ CH <sub>2</sub>          |
|    |                   | 2.16(t)  | $\beta$ CH <sub>2</sub>           |
|    |                   | 2.64(t)  | $\gamma$ CH <sub>2</sub>          |
|    |                   | 3.87(m)  | $\alpha$ CH                       |
| 14 | Acetoacetate      | 2.27(s)  | CH <sub>3</sub>                   |
|    |                   | 3.43(s)  | CH <sub>2</sub>                   |
| 15 | Acetone           | 2.22(s)  | CH <sub>3</sub>                   |
| 16 | Glutamine         | 2.13(m)  | $\beta$ CH <sub>2</sub>           |
|    |                   | 2.44(m)  | $\gamma$ CH <sub>2</sub>          |
|    |                   | 3.78(t)  | $\alpha$ CH                       |
| 17 | Citrate           | 2.52(d)  | half CH <sub>2</sub>              |
|    |                   | 2.68(d)  | half CH <sub>2</sub>              |
| 18 | Aspartate         | 2.66(dd) | half $\beta$ -CH <sub>2</sub>     |
|    |                   | 2.80(dd) | half $\beta$ -CH <sub>2</sub>     |
|    |                   | 3.89(dd) | $\alpha$ CH                       |
| 19 | Dimethylglycine   | 2.91(s)  | N-CH <sub>3</sub>                 |
| 20 | Creatine          | 3.03(s)  | N-CH <sub>3</sub>                 |
|    |                   | 3.93(s)  | CH <sub>2</sub>                   |
| 21 | Choline           | 3.20 (s) | N-(CH <sub>3</sub> ) <sub>3</sub> |
| 22 | TMAO              | 3.26(s)  | CH <sub>3</sub>                   |
| 23 | Myo-inositol      | 3.33(t)  | 5-CH                              |
|    |                   | 3.53(dd) | 1,3-CH                            |
|    |                   | 3.62(t)  | 4,6-CH                            |
|    |                   | 4.06(t)  | 2-CH                              |
| 24 | Scyllo-inositol   | 3.35(s)  | CHOH                              |
| 25 | $\beta$ -Glucose  | 3.90(dd) | half CH <sub>2</sub> -C6          |
| 26 | $\alpha$ -Glucose | 5.23(d)  | 1-CH                              |
| 27 | Glycine           | 3.55(s)  | CH <sub>2</sub>                   |
| 28 | Threonine         | 1.32(d)  | $\gamma$ CH <sub>3</sub>          |
|    |                   | 3.60(d)  | $\alpha$ CH                       |

|    |                                |           |                            |
|----|--------------------------------|-----------|----------------------------|
|    |                                | 4.23(m)   | $\beta\text{CH}_2$         |
| 29 | Glucose/amino acids resonances | 3.35-3.95 | ring protons/ $\alpha$ -CH |
| 30 | Urea                           | 5.77(brs) | $\text{NH}_2$              |
| 31 | Fumaric acid                   | 6.52(s)   | CH                         |
| 32 | Tyrosine                       | 6.88(d)   | 3or5 CH                    |
|    |                                | 7.18(d)   | 2or6 CH                    |
| 33 | Histidine                      | 7.03(s)   | 4-CH                       |
|    |                                | 7.74(s)   | 2-CH                       |
| 34 | Formate                        | 8.45(s)   | CH                         |
| 35 | Phenylalanine                  | 7.31(m)   | 2,6-CH                     |
|    |                                | 7.35(m)   | 4-CH                       |
|    |                                | 7.40(m)   | 3,5-CH                     |

---

<sup>a</sup> keys for multiplicity in parenthesis: s, singlet; d, doublet; t, triplet; q, quartet; m, multiplet; dd, doublet of doublet. TMAO: trimethylamine N-oxide.
